# Supplementary material
Source: publisher figshare collection journal article supplement (https://tandf.figshare.com/articles/dataset/_/9980945)
Supplement: Supplementary file 1 [file 1]

Archive with 4 entries (4 files):
- iafd_a_1674874_sm8819.docx
- iafd_a_1674874_sm8818.pdf
- iafd_a_1674874_sm8817.pdf
- iafd_a_1674874_sm8816.pdf
