# Supplementary material
Source: publisher figshare collection journal article supplement (https://tandf.figshare.com/articles/dataset/_/9980945)
Supplement: Supplementary file 1 [file 1 › iafd_a_1674874_sm8816.pdf]

## TOPIC GUIDE

### Carers

#### Evaluation of the impact of the Edinburgh Cognitive and Behavioural ALS Screen (ECAS) and neuropsychological intervention in Motor Neurone Disease (MND).

---

#### BACKGROUND

- Did you complete an interview with a health professional about changes you may have noticed in (insert name of patient)'s behaviour?
- If so, how long ago did you do this? Who interviewed you (which health professional)?

#### IMPACT OF ASSESSMENT (If they completed a behavioural interview)

- What was the experience like for you?

#### IMPACT OF NEUROPSYCHOLOGICAL INTERVENTION

- Have you or (insert name of patient) had any contact with a neuropsychologist/psychologist?
  - If yes, what did they offer in terms of support/advice?
  - If yes, what was the most helpful aspect of this?
  - Were you satisfied with the support/advice?
- Did you or (insert name of patient) make any changes to your routine or daily life after contact with the neuropsychologist?
  - If yes, what were those changes?
  - How have those changes been beneficial to you?
  - Were there negative consequences of making these changes?

## IMPACT ON OTHER ASPECTS OF CARE

- Have any other health professionals offered support/advice in relation to possible changes in (insert name of patient)'s thinking/behaviour?
  - What did they offer in terms of support/advice?
  - If yes, what was the most helpful aspect of this?
  - Were you satisfied with the support/advice?
  
- Did you or (insert name of patient) make any changes to your routine or daily life after support/advice from this/these health professional(s)?
  - If yes, what were those changes?
  - How have those changes been beneficial to you?
  - Were there negative consequences of making these changes?
