# Supplementary material
Source: publisher figshare collection journal article supplement (https://tandf.figshare.com/articles/dataset/_/9980945)
Supplement: Supplementary file 1 [file 1 › iafd_a_1674874_sm8818.pdf]

## **TOPIC GUIDE**

### **Patients**

#### **Evaluation of the impact of the Edinburgh Cognitive and Behavioural ALS Screen (ECAS) and neuropsychological intervention in Motor Neurone Disease (MND).**

---

#### **BACKGROUND**

- When did you do the ECAS? How long after you received your diagnosis of MND?
- Who did the ECAS with you (which health professional)?

#### **IMPACT OF ASSESSMENT**

- What was the experience like for you?

#### **IMPACT OF NEUROPSYCHOLOGICAL INTERVENTION**

- Have you had any contact with a neuropsychologist/psychologist?
  - If yes, what did they offer in terms of support/advice?
  - If yes, what was the most helpful aspect of this?
  - Were you satisfied with the support/advice?
- Did you make any changes to your routine or daily life after contact with the neuropsychologist?
  - If yes, what were those changes?
  - How have those changes been beneficial to you?
  - Were there negative consequences of making these changes?

## IMPACT ON OTHER ASPECTS OF CARE

- Have any other health professionals offered support/advice in relation to possible changes in your thinking/behaviour?
  - What did they offer in terms of support/advice?
  - If yes, what was the most helpful aspect of this?
  - Were you satisfied with the support/advice?
- Did you make any changes to your routine or daily life after support/advice from this/these health professional(s)?
  - If yes, what were those changes?
  - How have those changes been beneficial to you?
  - Were there negative consequences of making these changes?
