# Supplementary material
Source: publisher figshare collection journal article supplement (https://tandf.figshare.com/articles/dataset/_/9980945)
Supplement: Supplementary file 1 [file 1 › iafd_a_1674874_sm8819.docx]

**ONLINE SURVEY QUESTIONS (administered using Qualtrics survey software)**

**1. Please type your job title into the box below.**

**2. Please write the name of the clinic or community team in which you see patients with MND. Please include the geographical location.**

**3. Do any of your patients with MND undergo a cognitive/behavioural assessment (this may be conducted by yourself, a neuropsychologist, or another health professional)?**

Yes / No

***If ‘yes’ survey tool skips to 8.***

**4. Is the assessment of patients with MND for cognition/behaviour likely to begin within the next 12 months?**

Yes / No

**If ‘no’ survey tool skips to 6.**

**5. If known, please briefly outline:**

**(1) who will conduct the assessment (2) where the assessment will take place**

***Once completed, survey tool skips to END OF SURVEY***

**6. Would you consider arranging for patients to be assessed in the future?**

Yes/ No

***If ‘yes’ survey tool skips to END OF SURVEY If ‘no’ survey proceeds to 7.***

**7. Please outline why assessment of cognition/behaviour in patients with MND is NOT being considered.**

***Once completed, survey tool skips to END OF SURVEY***

**8. Whose role is it to carry out the cognitive/behavioural assessment on patients with MND? Check all that apply:**

- Clinical neuropsychologist
- Psychologist (other)
- Nurse
- Occupational Therapist
- Other (please specify) ________________

**9. What method/test is used to assess patients for cognitive/behavioural change? Check all that apply:**

ECAS/ Other (please specify) _________________

**10. Where does the cognitive/behavioural assessment take place? Check all that apply:**

- MND clinic /Patient’s home/ Other (please specify) ___________________

**11. Do you assess ALL patients with MND for cognition and behaviour?**

- Yes, ALL patients with MND are assessed
- No, only some patients with MND are assessed

***If ‘no’ survey tool skips to 14.***

**12. At what time point in the care pathway is cognitive/behavioural assessment usually first carried out (e.g. at diagnosis)?**

**13. Are patients assessed more than once in the course of their disease?**

Yes/ No/ Only some patients

***Once completed, skips to 15.***

**14. What factors determine whether or not an assessment is carried out?**

**15. Do you refer any patients with MND to local neuropsychology services?**

Yes/ No

***If ‘no’ then skips to 18.***

**16. Please provide contact details for the neuropsychologist/neuropsychology service to which you refer patients.**

**17. Please describe the factors that determine whether or not a patient is referred to a neuropsychologist/neuropsychology service.**

**18. Do you refer any patients with MND to psychiatry services?**

Yes/ No

***If ‘no’ skips to 20.***

**19. Please describe the factors that determine whether or not a patient is referred to psychiatry services.**

**20. Do the results of the cognitive/behavioural assessment inform your clinical practice?**

Yes/ No

***If ‘no’ skips to 22.***

**21. Please describe the ways in which the results of the assessment inform your clinical practice.**

**22. Why do you feel that the results of the assessment do not inform your clinical practice?**

**END OF SURVEY**
